# Supplementary material for: Lead-Free Copper-Based Perovskite Nanonets for Deep Ultraviolet Photodetectors with High Stability and Better Performance
Source: MDPI journal article supplement (doi:10.3390/nano12193264), 2022-09-20
Supplement: s1 [file s1]

## Supporting Information

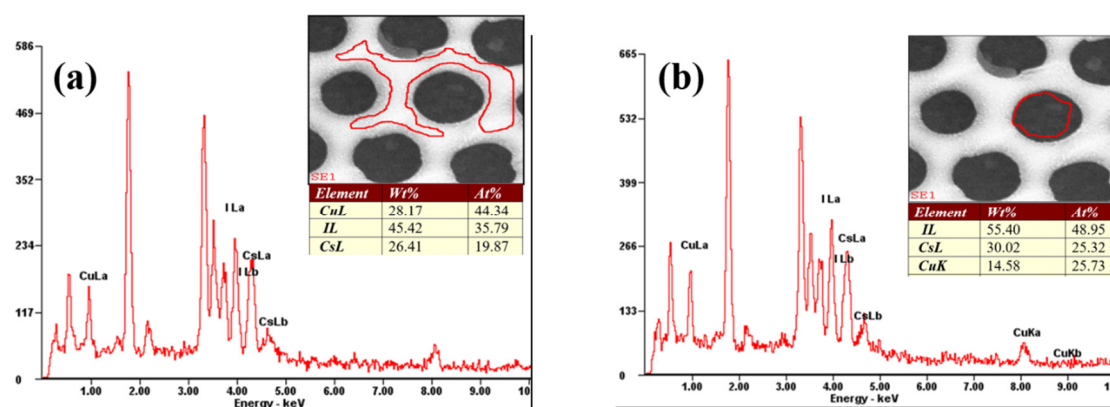

**Figure S1.** Energy dispersive X-ray spectroscopy (EDS) and the corresponding scanning electron microscopy images of  $\text{Cs}_3\text{Cu}_2\text{I}_5$  nanoholes raised and depressed parts (a, b)

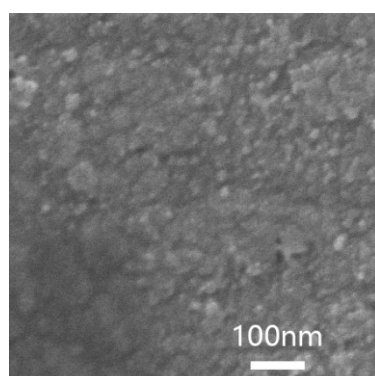

**Figure S2.** SEM of  $\text{Cs}_3\text{Cu}_2\text{I}_5$  compact film prepared by the traditional spin-coating.

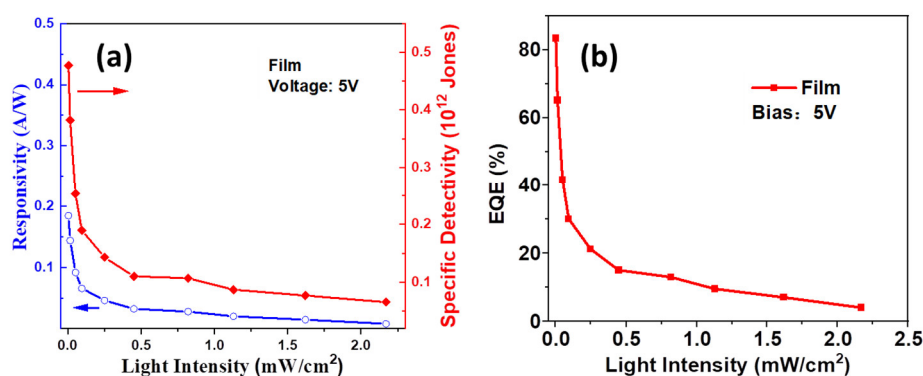

**Figure S3.** (a) Responsivity and detectivity of the compact film photodetector versus the light density. The biggest responsivity is  $0.185 \text{ A W}^{-1}$ , the highest detectivity is  $0.48 \times 10^{12}$  Jones. (b) The EQE of the compact film photodetector versus the light density. The highest EQE is 85%.

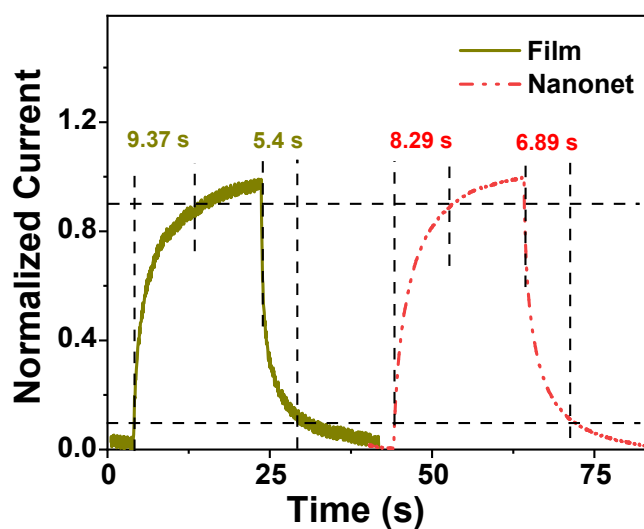

**Figure S4.** The normalized current of film PD or nanonet PD at an off-on-off cycle by using a chopper. The rise time and decay time were estimated at 90% or 10% maximal photo current.

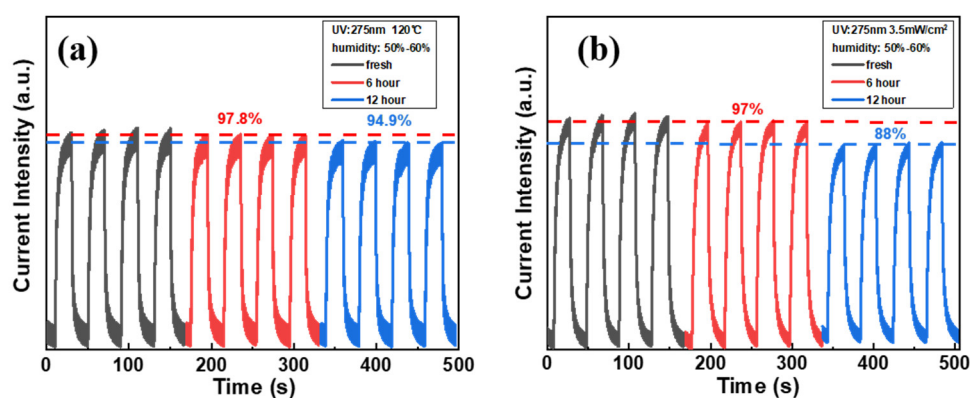

**Figure S5.** The normalized I-t curves of the nanonet photodetector freshly-fabricated or treated at different environments. (a) under thermal environment at temperature of 120 °C for 6 h and 12 h. (b) under 275nm, 3.5 mW/cm<sup>2</sup> strong ultraviolet light illumination. After treatment, I-t curve of PD was tested under the same condition by using a chopper to turn on or turn off the photo.
